# Supplementary material for: Residues contributing to drug transport by ABCG2 are localised to multiple drug-binding pockets
Source: PubMed Central journal article supplement (PMC5934980; doi:10.1042/bcj20170923), 2018-05-04

**Supplementary Data**

Table S1. List of primers used in this study.

| Mutation | Primer 5'-3'                                        |
|----------|-----------------------------------------------------|
| T402A    | cagatcattgtc <b>Gc</b> agtcgtactgggac               |
| L405A    | gtcacagtcgta <b>GCg</b> ggactggttatag               |
| S440A    | ccaaccagtgtttc <b>GCc</b> agtgtttcagcc              |
| S443A    | cagcagtgtt <b>Gcag</b> ccgtggaactc                  |
| S519A    | gatggtggttat <b>GcT</b> gccagttccatg                |
| M523A    | tcagccagttcc <b>GCA</b> gcactggccatag               |
| L540A    | gtagcaaacactt <b>GCc</b> atgaccatctgt               |
| I543A    | cttctcatgacc <b>GCc</b> tgttttgtgtttatg             |
| F640A    | gtatgattgttatt <b>GCc</b> ctcacaattgcctac           |
| I643A    | gtatatttcctcaca <b>GcT</b> gcctacctgaaattg          |
|          |                                                     |
| D477A    | ggaaaactgttatct <b>GCC</b> ttattacccatgagg          |
| L478A    | ctgttatctgat <b>GCC</b> ttacccatgaggatg             |
| L479A    | ctgttatctgattta <b>GCa</b> cccatgaggatg             |
| P480A    | gttatctgattatta <b>GcG</b> atgaggatgttacc           |
| M481A    | ctgattttattacc <b>GCC</b> aggatgttacc               |
| R482A    | gatttattacccatg <b>GCg</b> atgttacc                 |
| M483A    | gatttattacccatgCg <b>AGCg</b> ttaccaagtattatatttacc |
| L484A    | cccatgaggatg <b>GCa</b> ccaagtattatatttacc          |
| S486A    | gaggatgttacca <b>GCC</b> attatatttacctg             |
| I487A    | gttaccaagt <b>GCG</b> atatttacctg                   |
| I488A    | gttaccaagtatt <b>GCC</b> tttacctgtatagtg            |
| F489A    | ccaagtattata <b>GCG</b> acctgtatagtgtac             |
| T490A    | ccaagtattatatt <b>Gcc</b> tgtatagtgtacttcatg        |
| C491A    | caagtattatatttacc <b>GCC</b> atCgtgtacttcatgttagg   |
| I492A    | gtattatatttacctgt <b>GCC</b> gtgtacttcatg           |
| V493A    | cctgtatag <b>Cg</b> tacttcatgttaggattg              |
| Y494A    | cctgtatagt <b>GCG</b> ttcatgttaggattg               |
| F495A    | cctctatagtgtac <b>GCT</b> atgttaggattg              |
| M496A    | gtatagtgtacttc <b>GCC</b> ttaggattg                 |

|                                                                                                                                                                                                                                                                                                                                      |                                         |
|--------------------------------------------------------------------------------------------------------------------------------------------------------------------------------------------------------------------------------------------------------------------------------------------------------------------------------------|-----------------------------------------|
| L497A                                                                                                                                                                                                                                                                                                                                | gtgtacttcatg <b>GCG</b> ggattgaagcc     |
|                                                                                                                                                                                                                                                                                                                                      |                                         |
| M541A                                                                                                                                                                                                                                                                                                                                | gcaacacttctc <b>GCC</b> accatctg        |
| F545A                                                                                                                                                                                                                                                                                                                                | catgaccatctgt <b>GCC</b> gtgtttatgat    |
| M548A                                                                                                                                                                                                                                                                                                                                | ctgttttgtgttt <b>GCC</b> atgattttttcagg |
| F571A                                                                                                                                                                                                                                                                                                                                | cttcagtac <b>GCC</b> agcattcca          |
| L633A                                                                                                                                                                                                                                                                                                                                | gaatcacgtggcc <b>GCG</b> gcttgatgattg   |
| M636A                                                                                                                                                                                                                                                                                                                                | gccttggttgt <b>GCG</b> attgtattttcc     |
| <p>Mutations are denoted with the single letter amino acid code. All primers show the mutation to alanine in bold, with the base changes required for this in uppercase. Any other uppercase bases denote changes in sequence silent with respect to the codon, but which allowed for screening by restriction enzyme digestion.</p> |                                         |

Table S2. Binding site comparison.

Residues proposed to interact with mitoxantrone from this study, from the Hegedus homology model {Laszlo, 2016 #3547} are listed in four tables for easy comparison. Residues shared between predictions are shaded.

Kerr Surface Site

|      |      |      |      |      |
|------|------|------|------|------|
| M523 | C544 | F547 | M548 | F571 |
| I639 | F640 |      |      |      |

Kerr Buried Site

|      |      |      |      |      |
|------|------|------|------|------|
| Q398 | V401 | T402 | L405 | L433 |
| N436 | F439 | S440 | S443 | L447 |
| D477 | L478 | M481 | R482 | P485 |
| S486 | I488 | F489 | T490 | M510 |
| L513 | M514 | V516 | A517 | S521 |

Hegedus Site 2

|      |      |      |      |      |
|------|------|------|------|------|
| L388 | A394 | A397 | Q398 | I399 |
| V401 | T402 | L405 | Q437 | C438 |
| S440 | S441 | V442 | S443 | A444 |
| V445 | E446 | L447 | F448 | V450 |
| K473 | D477 | L478 | M481 | R482 |
| P485 | S486 | A517 | A520 | S521 |
| A524 |      |      |      |      |

Hegedus Site 3

|      |      |      |      |      |
|------|------|------|------|------|
| A397 | V401 | F439 | S440 | V442 |
| S443 | V445 | E446 | L447 | V449 |
| V533 | V534 | S535 | V536 | A537 |
| T538 | L539 | L540 | M541 | T542 |
| I543 | F545 |      |      |      |
|      |      |      |      |      |

## Supplementary Figure Legends

**Supplementary Figure S1. Conservation of transmembrane helix 3 in ABCG2.** Sequences were aligned using ClustalO and the yellow highlighted area represents residues 477-497 of human ABCG2. Conservation is denoted by "\*" and similarity by ":" or "." below the alignment.

**Supplementary Figure S2. Cell surface localisation of the ABCG2 variants.** sfGFP-tagged variant isoforms of ABCG2 were imaged either using a confocal plate reader (excitation wavelength of 488nm and emission bandpass filter of 525/50 nm), or with a confocal laser scanning microscope (excitation wavelength of 488nm and emission collected at 500-550nm). In both cases, cells were subsequently washed twice with pre-warmed (37°C) phenol-red free HBSS (Hank's Balanced Salt Solution, Sigma Aldrich) immediately prior to imaging. Scale bar represents 20  $\mu$ m.

**Supplementary Figure S3. Expression level of ABCG2 variants.** Cells expressing mutant isoforms of ABCG2 were quantified by flow cytometry for cellular sfGFP fluorescence as a measure of total sfGFP-ABCG2 protein expression. Upper panel **A** represents TM3 mutants, lower panel **B** represents lateral slice residues. Data are the mean ( $\pm$  standard error of the mean) of at least 3 independent experiments.

**Supplementary Figure S4. Catalytically inactivating mutation abrogate gain of transport function.** ABCG2 carrying mutation at F640A and Walker B mutation E211Q showed no Ko143-inhibitable transport of daunorubicin confirming that ATP hydrolysis is required for the gain of daunorubicin transport seen in the single F640A mutant.

**Supplementary Figure S5. Structural mapping of residues mutated in this study.** Top panel inset represents the ABCG2 homology model [29] with mutations colour coded as in previous figures and stick models of both the proposed surface site and buried site for mitoxantrone shown in larger scale in the main figure. Lower panels represent orthogonal views.

# Supplementary Figure 1

## TM3, 477-497 (Homo sapiens)

|                        |              |                       |                        |
|------------------------|--------------|-----------------------|------------------------|
| Homo sapiens           | RVSSYFLGKLLS | DLLPMRMLPSIIFTCIVYFMI | GLKPKADAFFVMMFTLMMVAY  |
| Gallus gallus          | RVSAYFLALMLG | DLLPMRTAPAIIFSCITYWMI | GFQAIAGRFFFFMLALVMVSY  |
| Salmo salar            | RVSVYFLSKILS | DIITLRTIPAIIFSCVAYFMI | GFKTTAAFFIFMFTVTLVAY   |
| Xenopus laevis         | RLSAYFFAKLFT | DLLPMRTLPSIIFTAVLYFMI | GFKATAGAFFIMMFTLTMIAAY |
| Mus musculus           | RVSSYFFGKVMS | DLLPMRFLPSVIFTCVLYFMI | GLKKTVDAAFFIMMFTLIMVAY |
| Macaca mulatta         | RVSSYFFGKLLS | DLLPMRMLPSIIFTCIVYFMI | GLKPVEAFFIMMFTLMMVAY   |
| Canis lupis familiaris | RVSSYFFGKLLS | DLLPMRMLPSIIFTCIIYFLL | GLKPVEAFFIMMFTLMMVAY   |
| Sus scrofa             | RVSSYFFGKLLS | DLLPMRMLPSIIFTCITYFLL | GLKPAVGSFFIMMFTLMMVAY  |
| Bos taurus             | RVSSYFFGKLLS | DLLPMRMLPSIIFTCITYFLL | GLKPKVEAFFIMMLTLMMVAY  |

\*:\* \*\*:. : : \*:: :\* \*::\*\*:. : \*::\*: : \*\*.\*: : : \*

## Supplementary Figure 2

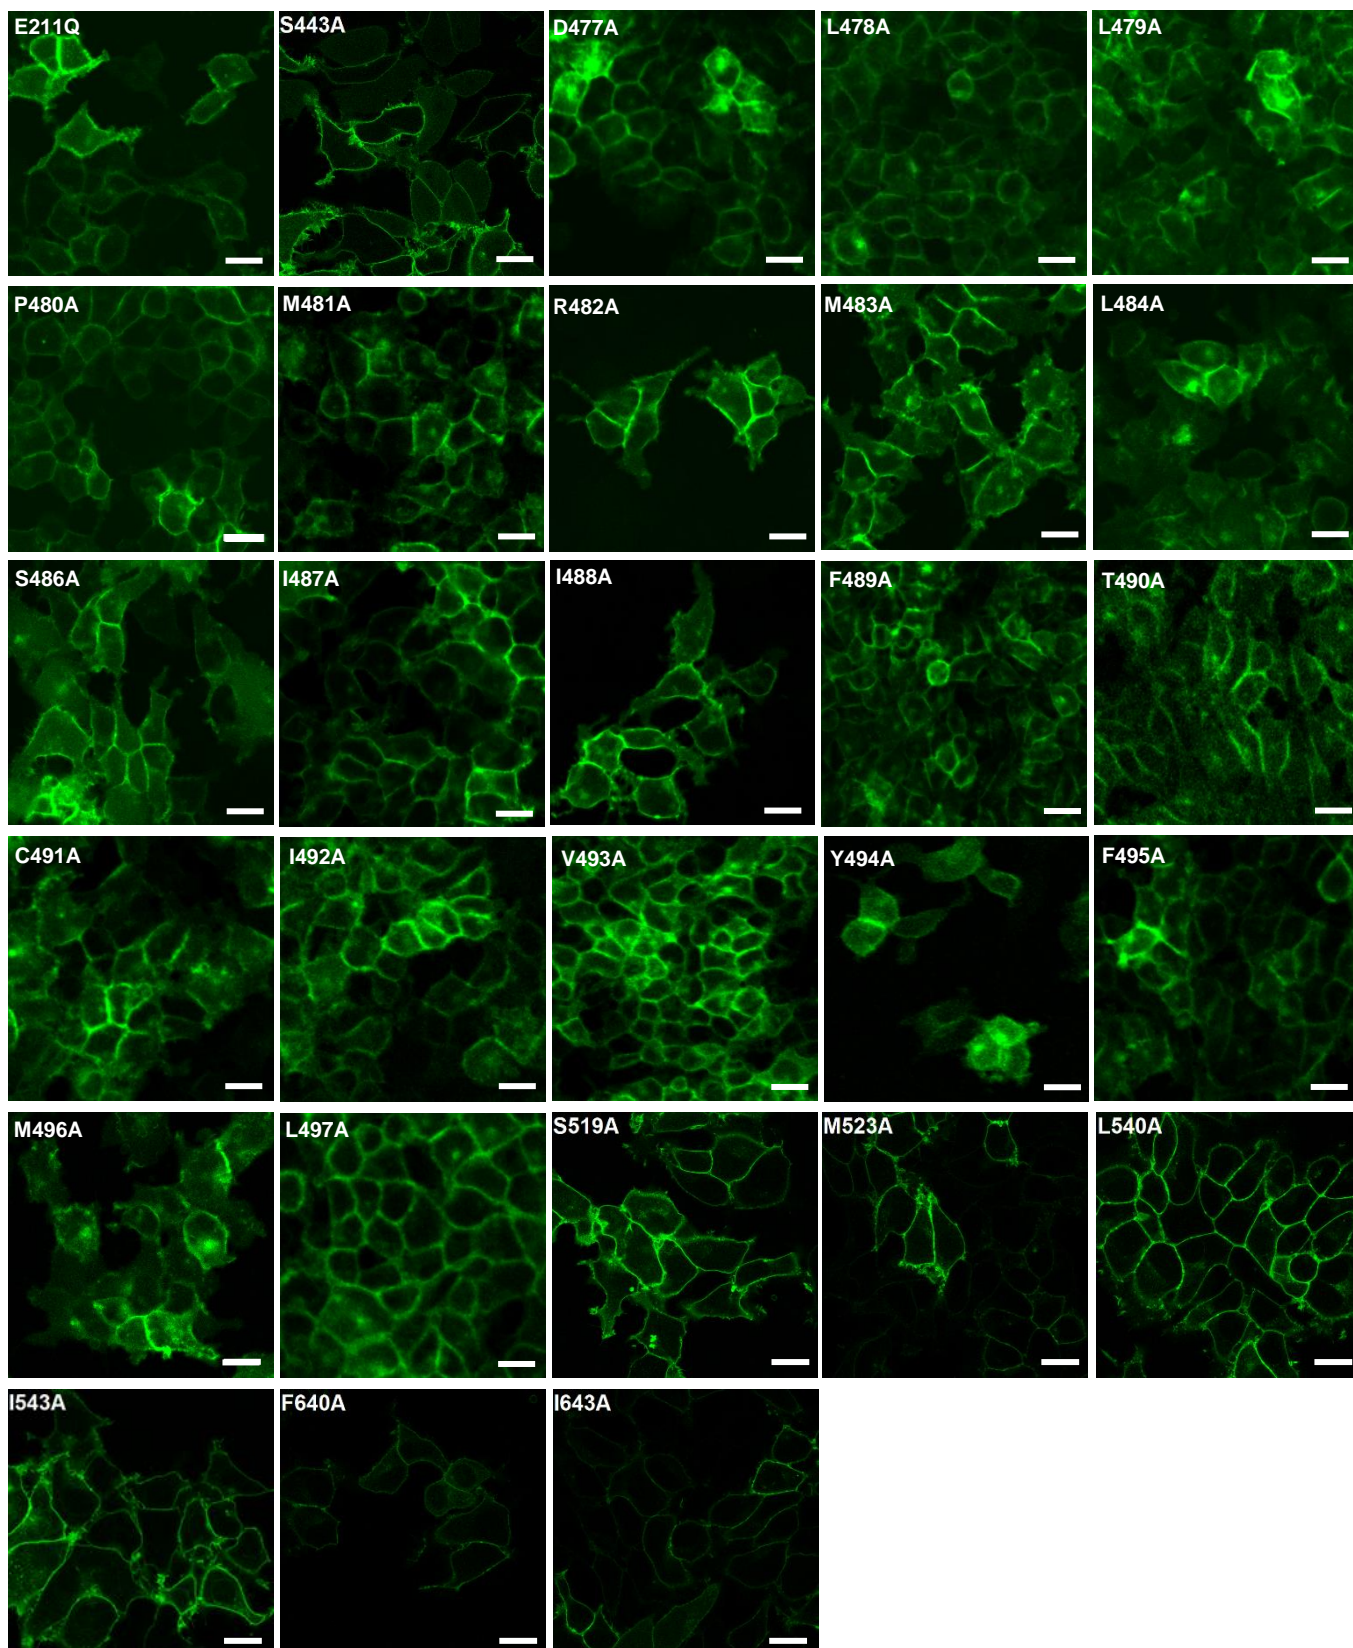

# Supplementary Figure 3

**A**

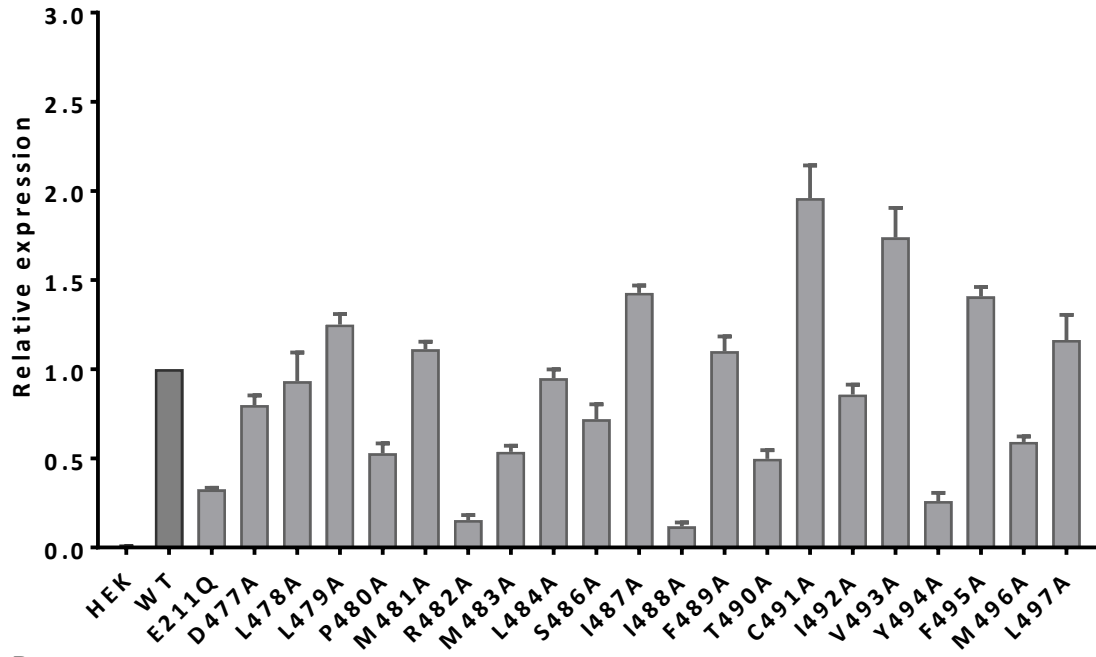

**B**

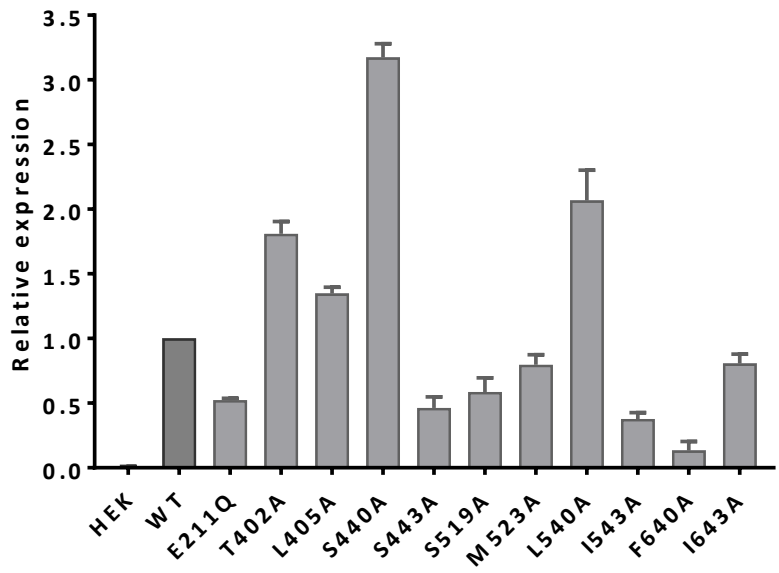

## Supplementary Figure 4

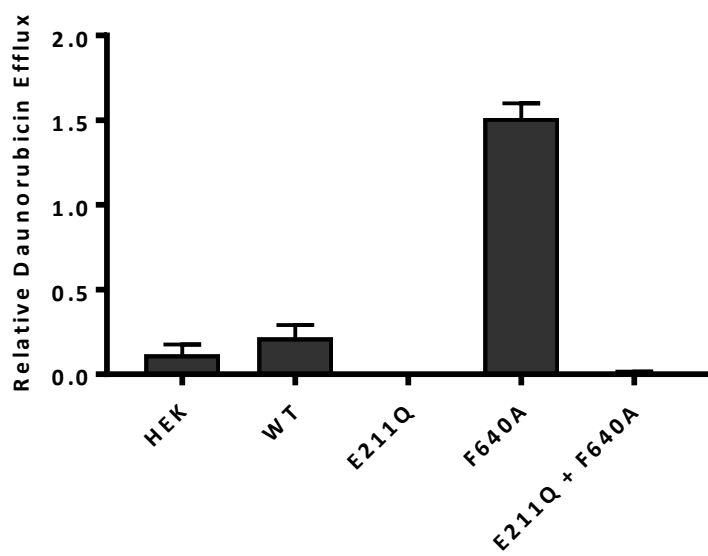



# Supplementary Figure 5

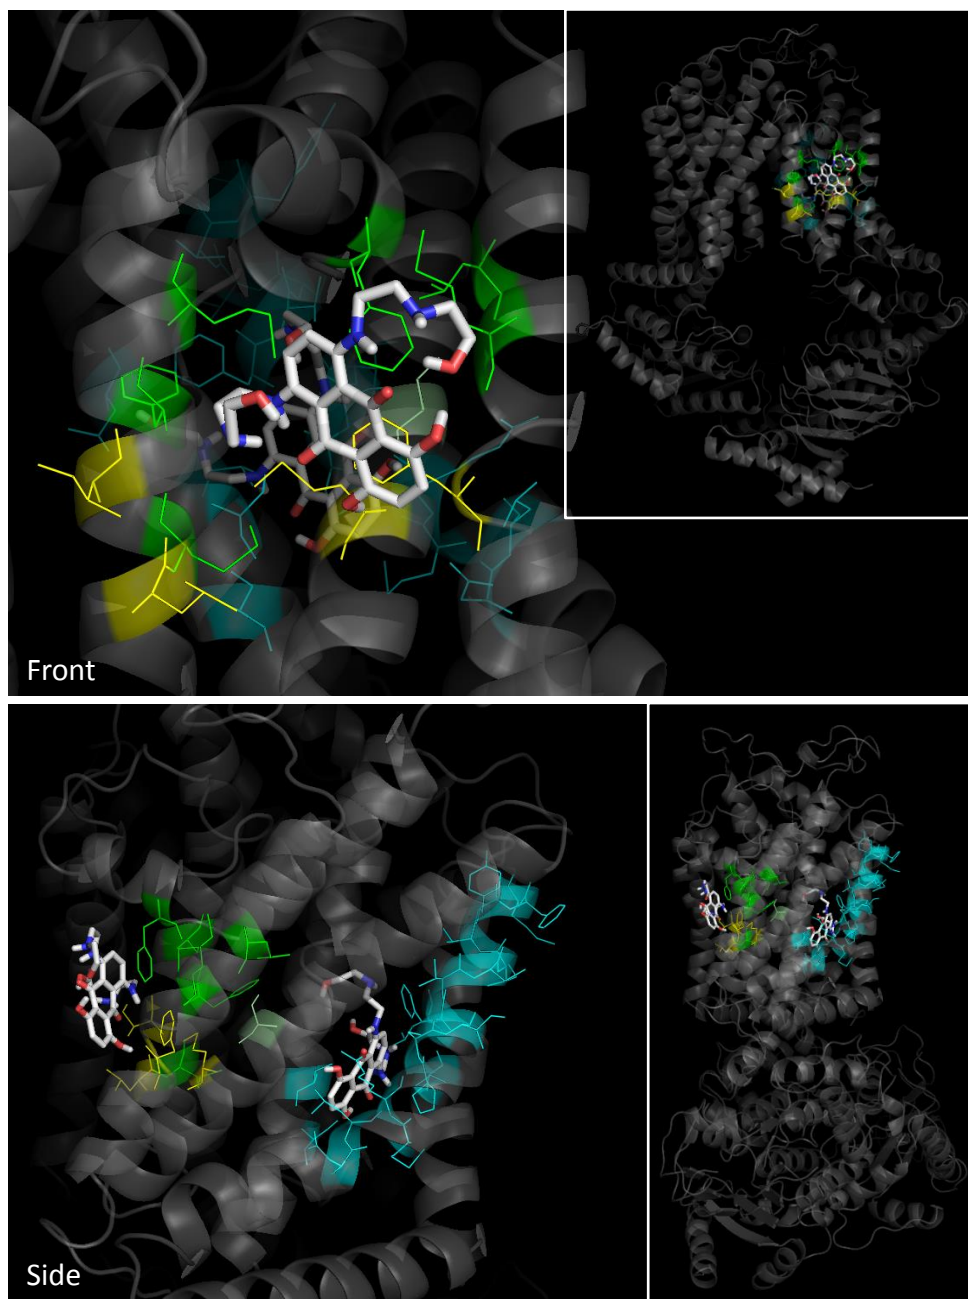

Supplement: BCJ-475-1553-s1.pdf [file BCJ-475-1553-s1.pdf]
